# Supplementary material
Source: Research Square preprint supplement (doi:10.21203/rs.3.rs-9063139/v1)
Supplement: Supplementary file 1 [file 522e03fc5426af6fd115fd38.docx]

**Table 1**. Pseudo first order rate constant of Crystal violet for photocatalytic degradation

| Irradiations | Amount of LDS nanoparticles (mg) | Concentration of dye (mg/ml) | Rate constant (k)  min−1 | Liner equation |
| --- | --- | --- | --- | --- |
| With UV | 500 | 10 | 0.0205 | 0.9962 |
| Without UV | 500 | 10 | 0.01092 | 0.9942 |

**Table 2**. Compare the Catalytic parameters result of Absorbed HRP in LDS and Free HRP.

| **Enzyme** | **Km**  **(mol)** | **Vmax**  **(mol)** | **[E0]**  **(mol)** | **Kcat S-1** |
| --- | --- | --- | --- | --- |
| Absorbed HRP in LDS | 2.1 × 10−3 | 4×10−3 | 2 ×10−8 | 2 × 105 |
| Free HRP | 2.0 × 10−3 | 4.4 ×10−3 | 2 ×10−8 | 2.20 ×105 |
